# Supplementary material
Source: HighWire-hosted journal article supplement (https://bmjopen.bmj.com/content/12/8/e057981)
Supplement: inline-supplementary-material-3 [file inline-supplementary-material-3.pdf]

**Supplementary table 2. Binary logistic regression analysis of maternal knowledge, attitudes and practices related to neonatal jaundice for mothers with yuesao (N=138)**

| Variables                            | Classification                   | Knowledge |              |              | Attitude |              |              | Practices |       |    |
|--------------------------------------|----------------------------------|-----------|--------------|--------------|----------|--------------|--------------|-----------|-------|----|
|                                      |                                  | OR        | 95%CI        | P            | OR       | 95%CI        | P            | OR        | 95%CI | P  |
| Education level                      | High school and below (Ref.)     |           |              | <b>0.048</b> |          |              | <b>0.033</b> |           |       |    |
|                                      | College and undergraduate course | 7.123     | 1.387~36.588 | 0.019        | 7.683    | 1.583~37.297 | 0.011        |           |       | NI |
|                                      | Postgraduate student or above    | 4.316     | 0.645~28.877 | 0.132        | 9.900    | 1.539~63.689 | 0.016        |           |       |    |
| Average family monthly income (RMB)  | ≤5000 (Ref.)                     |           |              |              |          |              |              |           |       |    |
|                                      | 5001~10000                       |           |              |              |          |              |              |           |       |    |
|                                      | 10001~20000                      |           | NI           |              |          | NI           |              |           | NI    |    |
|                                      | 20001~30000                      |           |              |              |          |              |              |           |       |    |
| Prior education on neonatal jaundice | ≥30001                           |           |              |              |          |              |              |           |       |    |
|                                      | Yes (Ref.)                       |           |              |              |          |              |              |           |       |    |
| Neonate sex                          | No                               |           | NI           |              |          | NI           |              |           | NI    |    |
|                                      | Female (Ref.)                    |           |              |              |          |              |              |           |       |    |
| Occupation                           | Male                             |           | NI           |              |          | NI           |              |           | NI    |    |
|                                      | Employed (Ref.)                  |           |              | <b>0.017</b> |          |              |              |           |       |    |
|                                      | Self-employed                    | 0.131     | 0.034~0.496  | 0.003        |          | NI           |              |           | NI    |    |

|                 |             |       |             |       |           |           |       |             |       |
|-----------------|-------------|-------|-------------|-------|-----------|-----------|-------|-------------|-------|
|                 | Homemaker   | 1.182 | 0.393~3.559 | 0.766 |           |           |       |             |       |
|                 | Other       | 0.306 | 0.390~0.064 | 0.306 |           |           |       |             |       |
| Knowledge level | Poor (Ref.) |       |             |       | <i>NA</i> | <i>NI</i> |       |             |       |
|                 | good        |       |             |       |           |           | 0.505 | 0.254~1.003 | 0.051 |
| Attitude level  | poor (Ref.) |       |             |       | <i>NI</i> | <i>NA</i> |       |             |       |
|                 | good        |       |             |       |           |           |       | <i>NI</i>   |       |

**Note:** *OR*, odds ratio; *CI* confidence interval; *NI*, not included in the final logistic regression analysis; *NA*, not applicable.

**Supplementary table 3. Binary logistic regression analysis of maternal knowledge, attitudes and practices related to neonatal jaundice for mothers without yuesao (N=265)**

| Variables                           | Classification                   | Knowledge |               |              | Attitude  |              |          | Practices |              |          |
|-------------------------------------|----------------------------------|-----------|---------------|--------------|-----------|--------------|----------|-----------|--------------|----------|
|                                     |                                  | <i>OR</i> | <i>95%CI</i>  | <i>P</i>     | <i>OR</i> | <i>95%CI</i> | <i>P</i> | <i>OR</i> | <i>95%CI</i> | <i>P</i> |
| Education level                     | High school and below (Ref.)     |           |               | <b>0.001</b> |           |              |          |           |              |          |
|                                     | College and undergraduate course | 2.832     | 1.430~5.610   | 0.030        |           | <i>NI</i>    |          |           | <i>NI</i>    |          |
|                                     | Postgraduate student or above    | 20.140    | 3.036~133.601 | 0.002        |           |              |          |           |              |          |
| Average family monthly income (RMB) | ≤5000 (Ref.)                     |           |               |              |           |              |          |           |              |          |
|                                     | 5001~10000                       |           |               |              |           | <i>NI</i>    |          |           | <i>NI</i>    |          |
|                                     | 10001~20000<br>20001~30000       |           |               |              |           |              |          |           |              |          |

|                                      |                 |       |              |              |           |             |              |       |             |              |
|--------------------------------------|-----------------|-------|--------------|--------------|-----------|-------------|--------------|-------|-------------|--------------|
| Prior education on neonatal jaundice | ≥30001          |       |              |              |           |             |              |       |             |              |
|                                      | Yes (Ref.)      |       |              |              |           |             |              |       |             |              |
|                                      | No              | 5.335 | 1.654~17.208 | <b>0.005</b> | <i>NI</i> |             |              |       | <i>NI</i>   |              |
| Neonate sex                          | Female (Ref.)   |       |              |              |           |             |              |       |             |              |
|                                      | Male            | 2.083 | 1.233~3.518  | <b>0.006</b> | <i>NI</i> |             |              |       | <i>NI</i>   |              |
| Occupation                           | Employed (Ref.) |       |              |              |           |             |              |       |             |              |
|                                      | Self-employed   |       |              |              |           |             |              |       | <i>NI</i>   |              |
|                                      | Homemaker       |       |              |              |           |             |              |       | <i>NI</i>   |              |
|                                      | Other           |       |              |              |           |             |              |       |             |              |
| Knowledge level                      | Poor (Ref.)     |       |              |              |           |             |              |       |             |              |
|                                      | good            |       |              |              | 1.734     | 1.059~2.847 | <b>0.029</b> | 3.012 | 1.757~5.165 | <b>0.000</b> |
| Attitude level                       | poor (Ref.)     |       |              |              |           |             |              | 1.967 | 1.161~3.333 |              |
|                                      | good            |       |              |              |           |             |              |       |             | <b>0.012</b> |

**Note:** *OR*, odds ratio; *CI* confidence interval; *NI*, not included in the final logistic regression analysis; *NA*, not applicable.
